# Supplementary material for: Noninvasive Imaging of Cone Ablation and Regeneration in Zebrafish
Source: PubMed Central journal article supplement — Transl Vis Sci Technol. 2020 Sep 16;9(10):18. doi: 10.1167/tvst.9.10.18 (PMC7500127; doi:10.1167/tvst.9.10.18), 2020-09-16
Supplement: tvst-9-10-18_s001.pdf [file tvst-9-10-18_s001.pdf]

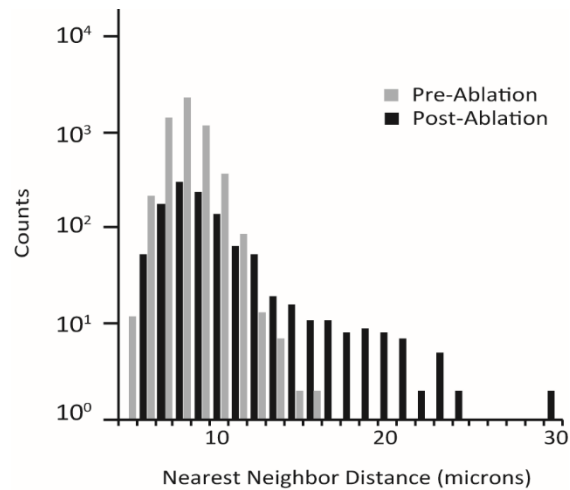

**Supplementary Figure 1.** Histogram of the nearest neighbor distance between zebrafish UV cones observed via OCT before and after metronidazole-mediated cone ablation. Nearest neighbor distance in pre-ablated UV cones shows a tight distribution, while nearest neighbor distance in the UV cones after metronidazole-mediated ablation has a much wider distribution, with a significantly larger average distance between the regenerated cones (Mann-Whitney,  $p < 0.00001$ ). Nearest neighbor distances were measured from OCT scans from the same retina before and after metronidazole-mediated ablation from the OCT scans shown in Figure 3. Data for pre-ablation nearest neighbor distance was aggregated from nine OCT scans from nine different retinas, while data for post-ablation was aggregated from three OCT scans at 14DPA, three OCT scans at 28DPA, and three OCT scans at 56DPA.
